# Supplementary material for: Network-inference-based prediction of the COVID-19 epidemic outbreak in the Chinese province Hubei
Source: Springer Nature journal article supplement (doi:10.1007/s41109-020-00274-2), 2020-07-08
Supplement: MOESM1 [file 18161030]

# Appendix: Network Inference-based Prediction of the COVID-19 Outbreak in the Chinese Province Hubei

Bastian Prasse<sup>1\*</sup>, Massimo A. Achterberg<sup>1</sup>, Long Ma<sup>1</sup> and Piet Van Mieghem<sup>1</sup>

<sup>1</sup> Faculty of Electrical Engineering, Mathematics and Computer Science, P.O Box 5031, 2600 GA Delft, The Netherlands

\* b.prasse@tudelft.nl

## Constraints on the Infection Probabilities

To ensure that the fraction of infected individuals  $\mathcal{I}_i[k]$  does not exceed one at every time  $k$ , we have added the second constraint in the LASSO (7). Indeed, the second constraint in the LASSO (7) ensures that  $\mathcal{I}_i[k] \leq 1$  at every time  $k$ , as shown by Lemma 1, whose proof is inspired by [1].

**Lemma 1.** *Suppose that  $\mathcal{I}_i[1] \geq 0$ ,  $\mathcal{R}_i[1] \geq 0$  and  $\mathcal{I}_i[1] + \mathcal{R}_i[1] \leq 1$  holds for every node  $i$ . Furthermore, assume that the curing probabilities  $\delta_i$  satisfy  $0 \leq \delta_i \leq 1$  and the infection probabilities  $\beta_{ij} \geq 0$  satisfy*

$$\sum_{j=1}^N \beta_{ij} \leq 1. \quad (10)$$

*Then, it holds that  $\mathcal{I}_i[k] \geq 0$ ,  $\mathcal{R}_i[k] \geq 0$  and  $\mathcal{I}_i[k] + \mathcal{R}_i[k] \leq 1$  at every time  $k \in \mathbb{N}$  for every node  $i$ .*

*Proof.* We prove Lemma 1 by induction. Suppose that at time  $k$  for every node  $i$  it holds that

$$\mathcal{I}_i[k] \geq 0 \quad (11)$$

and

$$\mathcal{R}_i[k] \geq 0 \quad (12)$$

and

$$\mathcal{I}_i[k] + \mathcal{R}_i[k] \leq 1. \quad (13)$$

By assumption, it holds that  $0 \leq \delta_i \leq 1$  and  $\beta_{ij} \geq 0$ . Thus, we obtain from the SIR governing equations (3) and (13) yield that both  $\mathcal{I}_i[k+1]$  and  $\mathcal{R}_i[k+1]$  equal a sum of positive addends, which implies that

$$\mathcal{I}_i[k+1] \geq 0 \quad (14)$$

and

$$\mathcal{R}_i[k+1] \geq 0. \quad (15)$$

Furthermore, we obtain for every node  $i$  that

$$\mathcal{I}_i[k+1] + \mathcal{R}_i[k+1] = \mathcal{I}_i[k] + \mathcal{R}_i[k] + (1 - \mathcal{I}_i[k] - \mathcal{R}_i[k]) \sum_{j=1}^N \beta_{ij} \mathcal{I}_j[k]. \quad (16)$$

From (11), (12) and (13), we obtain that  $\mathcal{I}_i[k] + \mathcal{R}_i[k] \in [0, 1]$ . Since (12) and (13) imply that  $\mathcal{I}_i[k] \leq 1$ , it holds that

$$\sum_{j=1}^N \beta_{ij} \mathcal{I}_j[k] \leq \sum_{j=1}^N \beta_{ij} \leq 1. \quad (17)$$

Thus,  $\mathcal{I}_i[k+1] + \mathcal{R}_i[k+1] \leq 1$ , since the right side of (16) is a convex combination of 1 and  $\sum_{j=1}^N \beta_{ij} \mathcal{I}_j[k] \in [0, 1]$ .  $\square$

## Details of NIPA

Algorithm 1 describes the NIPA prediction method in pseudocode<sup>1</sup>. In line 4, the Matlab command `smoothdata` is called to remove erratic fluctuations of the raw data  $\mathcal{I}_{\text{rep},i}[k]$ . We denote the  $N \times 1$  infection state vector by  $\mathcal{I}[k] = (\mathcal{I}_1[k], \dots, \mathcal{I}_N[k])^T$  at any time  $k$ . The loop starting in line 8 iterates over all candidate values of the curing probability  $\delta_i$  which are in the set  $\Omega$ . Algorithm 1 calls the network inference method, which is stated in pseudocode by Algorithm 2. For a fixed curing probability  $\delta_i$ , the network inference in line 12 returns an estimate for the infection probabilities  $\beta_{i1}(\delta_i), \dots, \beta_{iN}(\delta_i)$ . Furthermore, the network inference returns the mean squared error  $\text{MSE}(\delta_i)$ , which corresponds to the first term in the objective of (7). The smaller the mean squared error  $\text{MSE}(\delta_i)$ , the better the fit of the SIR model (3) to the data  $\mathcal{I}_i[1], \dots, \mathcal{I}_i[n]$ . In line 14, the final estimate  $\hat{\delta}_i$  for the curing probability is obtained as the minimiser of the mean squared error  $\text{MSE}(\delta_i)$ . The estimate  $\hat{\delta}_i$  determines the final estimates  $\hat{\beta}_{i1}, \dots, \hat{\beta}_{iN}$  for the infection probabilities in line 15. From line 17 to line 27, the SIR model (3) is iterated, which results in the predicted fraction of infections  $\hat{\mathcal{I}}_i[n+1], \dots, \hat{\mathcal{I}}_i[n+n_{\text{pred}}]$  for all cities  $i$ .

To determine the regularisation parameter  $\rho_i$  in the LASSO (7), we consider 100 candidate values, specified by the set  $\Theta_i = \{\rho_{\min,i}, \dots, \rho_{\max,i}\}$ . In line 4 of Algorithm 2, the maximum value is set to  $\rho_{\max,i} = 2\|F_i^T V_i\|_\infty$ . If  $\rho_i > \rho_{\max,i}$ , then [2] the solution to the LASSO (7) is  $\beta_{ij} = 0$  for all cities  $j$ . For every value of the regularisation parameter  $\rho_i \in \Theta_i$ , we compute the mean squared error  $\text{MSE}(\delta_i, \rho_i)$  by 3-fold cross-validation [3]. For every fold, the rows of the matrix  $F_i$  and the vector  $V_i$  are divided into a training set  $F_{i,\text{train}}, V_{i,\text{train}}$  and a validation set  $F_{i,\text{val}}, V_{i,\text{val}}$ . We compute the solution  $\beta_{i1}, \dots, \beta_{iN}$  to the LASSO (7) on the training set of every fold  $F_{i,\text{train}}, V_{i,\text{train}}$ . The mean squared error  $\text{MSE}(\delta_i, \rho_i)$  then equals

$$\left\| V_{i,\text{val}} - F_{i,\text{val}} \begin{pmatrix} \beta_{i1} \\ \vdots \\ \beta_{iN} \end{pmatrix} \right\|_2^2,$$

averaged over all folds. Finally, we set the regularisation parameter  $\rho_i$  to the minimiser of  $\text{MSE}(\delta_i, \rho_i)$ . The final estimate  $\beta_{i1}(\delta_i), \dots, \beta_{iN}(\delta_i)$  for the infection probabilities is obtained by solving the LASSO (7)

<sup>1</sup>The Matlab code is available upon request to the authors.

---

**Algorithm 1** Network Inference-based Prediction Algorithm (NIPA)

---

- 1: **Input:** reported fraction of infections  $\mathcal{I}_{\text{rep},i}[1], \dots, \mathcal{I}_{\text{rep},i}[n]$  for all cities  $i$ ; prediction time  $n_{\text{pred}}$   
2: **Output:** predicted fraction of infections  $\hat{\mathcal{L}}_i[n+1], \dots, \hat{\mathcal{L}}_i[n+n_{\text{pred}}]$  for all cities  $i$

*Step 1 – Data preprocessing*

- 3:  $\mathcal{I}_{\text{rep},1}[17] \leftarrow (\mathcal{I}_{\text{rep},1}[16] + \mathcal{I}_{\text{rep},1}[18])/2$   
4:  $\mathcal{I}_i[1], \dots, \mathcal{I}_i[n] \leftarrow \text{smoothdata}(\mathcal{I}_{\text{rep},i}[1], \dots, \mathcal{I}_{\text{rep},i}[n])$  for all  $i = 1, \dots, N$   
5:  $\mathcal{I}[k] \leftarrow (\mathcal{I}_1[k], \dots, \mathcal{I}_N[k])^T$  for all  $k = 1, \dots, n$

*Step 2 – Network inference*

- 6: **for**  $i = 1, \dots, N$  **do**  
7:      $\mathcal{R}_i[1] \leftarrow 0$   
8:     **for**  $\delta_i \in \Omega$  **do**  
9:          $\mathcal{R}_i[k] \leftarrow \mathcal{R}_i[k-1] + \delta_i \mathcal{I}_i[k-1]$  for all  $k = 2, \dots, n$   
10:          $\mathcal{S}_i[k] \leftarrow 1 - \mathcal{I}_i[k] - \mathcal{R}_i[k]$  for all  $k = 1, \dots, n$   
11:          $v_i[k] \leftarrow (\mathcal{S}_i[k], \mathcal{I}_i[k], \mathcal{R}_i[k])^T$  for all  $k = 1, \dots, n$   
12:          $(\beta_{i1}(\delta_i), \dots, \beta_{iN}(\delta_i), \text{MSE}(\delta_i)) \leftarrow \text{Network inference}(\delta_i, v_i[1], \dots, v_i[n], \mathcal{I}[1], \dots, \mathcal{I}[n])$   
13:     **end for**  
14:      $\hat{\delta}_i \leftarrow \underset{\delta_i \in \Omega}{\text{argmin}} \text{MSE}(\delta_i)$   
15:      $(\hat{\beta}_{i1}, \dots, \hat{\beta}_{iN}) \leftarrow \beta_{i1}(\hat{\delta}_i), \dots, \beta_{iN}(\hat{\delta}_i)$   
16: **end for**

*Step 3 – Iterating SIR model*

- 17: **for**  $i = 1, \dots, N$  **do**  
18:      $\hat{\mathcal{L}}_i[n] \leftarrow \mathcal{I}_i[n]$   
19:      $\hat{\mathcal{R}}_i[1] \leftarrow 0$   
20:      $\hat{\mathcal{R}}_i[k] \leftarrow \hat{\mathcal{R}}_i[k-1] + \hat{\delta}_i \mathcal{I}_i[k-1]$  for all  $k = 2, \dots, n$   
21: **end for**  
22: **for**  $k = n+1, \dots, n+n_{\text{pred}}$  **do**  
23:     **for**  $i = 1, \dots, N$  **do**  
24:          $\hat{\mathcal{L}}_i[k] \leftarrow (1 - \hat{\delta}_i) \hat{\mathcal{L}}_i[k-1] + (1 - \hat{\mathcal{L}}_i[k-1] - \hat{\mathcal{R}}_i[k-1]) \sum_{j=1}^N \hat{\beta}_{ij} \hat{\mathcal{L}}_j[k-1]$   
25:          $\hat{\mathcal{R}}_i[k] \leftarrow \hat{\mathcal{R}}_i[k-1] + \hat{\delta}_i \hat{\mathcal{L}}_i[k-1]$   
26:     **end for**  
27: **end for**
-

on the whole matrix  $F_i$  and vector  $V_i$ . To solve the LASSO (7) numerically, we make use of the Matlab command `quadprog`.

---

**Algorithm 2** Network inference

---

- 1: **Input:** curing probability  $\delta_i$ ; viral state  $v_i[k]$  for  $k = 1, \dots, n$ ; infection state vector  $\mathcal{I}[k]$  for  $k = 1, \dots, n$
  - 2: **Output:** infection probability estimates  $\beta_{i1}(\delta_i), \dots, \beta_{iN}(\delta_i)$ ; mean squared error  $\text{MSE}(\delta_i)$
  - 3: Compute  $V_i$  and  $F_i$  by (5) and (6)
  - 4:  $\rho_{\max,i} \leftarrow 2\|F_i^T V_i\|_\infty$
  - 5:  $\rho_{\min,i} \leftarrow 10^{-4}\rho_{\max,i}$
  - 6:  $\Theta_i \leftarrow 100$  logarithmically equidistant values from  $\rho_{\min,i}$  to  $\rho_{\max,i}$
  - 7: **for**  $\rho_i \in \Theta_i$  **do**
  - 8: estimate  $\text{MSE}(\delta_i, \rho_i)$  by 3-fold cross-validation on  $F_i, V_i$  and solving (7) on the respective training set
  - 9: **end for**
  - 10:  $\rho_{\text{opt},i} \leftarrow \underset{\rho_i \in \Theta_i}{\text{argmin}} \text{MSE}(\delta_i, \rho_i)$
  - 11:  $(\beta_{i1}(\delta_i), \dots, \beta_{iN}(\delta_i)) \leftarrow$  the solution to (7) on the whole data set  $F_i, V_i$  for  $\rho_i = \rho_{\text{opt},i}$
  - 12:  $\text{MSE}(\delta_i) \leftarrow \text{MSE}(\delta_i, \rho_{\text{opt},i})$
- 

## Evaluation of the Prediction Accuracy of NIPA

We generate viral state sequences  $v_i[1], \dots, v_i[n]$  according to the SIR model (3) to evaluate the prediction accuracy of NIPA. We set the number of nodes to  $N = 16$  and the number of observations to  $n = 20$ . The curing probabilities  $\delta_i$  are set to a random number, uniformly distributed in  $[0.5, 1]$ . We perform two steps to generate the contact network  $B$ . First, we generate an  $N \times N$  adjacency matrix  $A$  with zero-one elements  $a_{ij} \in \{0, 1\}$  based on the (directed) Erdős-Rényi graph model [4]. For any two nodes  $i \neq j$ , we set  $a_{ij} = 1$  with link probability  $p = 0.3$ . If the resulting graph is not connected, then we repeat the random graph generation. We set the diagonal elements to  $a_{ii} = 1$  for every node  $i$ . Second, we set the elements of the matrix  $B$  to  $\beta_{ij} = 0$  if  $a_{ij} = 0$ . If  $a_{ij} = 1$ , then we set the infection probability  $\beta_{ij}$  to a random number, uniformly distributed in  $[0.1, 0.2]$ .

Fig 1 shows that NIPA accurately predicts the infection state  $\mathcal{I}_i[k]$  for every node  $i$  at every time  $k \geq n + 1$ . We emphasise that the true curing rates  $\delta_i$  are not in the set  $\Omega$  (with probability one). Thus, the estimates  $\hat{\delta}_i$  of NIPA cannot exactly equal the true curing rates  $\delta_i$ .

We denote the estimated contact network with the elements  $\hat{\beta}_{ij}$  by  $\hat{B}$ . To assess whether the estimated matrix  $\hat{B}$  is similar to the true matrix  $B$ , we calculate the area under the receiver-operating-characteristic curve (AUC) [5]. The AUC lies between 0 and 1, and an AUC of 1/2 is equivalent to tossing a coin to determine the presence ( $\hat{\beta}_{ij} = 1$ ) or absence ( $\hat{\beta}_{ij} = 0$ ) of a link. If the inferred network  $\hat{B}$  equals the true network  $B$ , then the AUC equals 1. The AUC of the estimate  $\hat{B}$  of Fig 1 equals merely 0.53. Hence, the topology of the estimate  $\hat{B}$  and the true matrix  $B$  have virtually no resemblance, which is in agreement with [6].

We perform further simulations to evaluate the robustness of NIPA against model errors  $w_i[k]$ . We

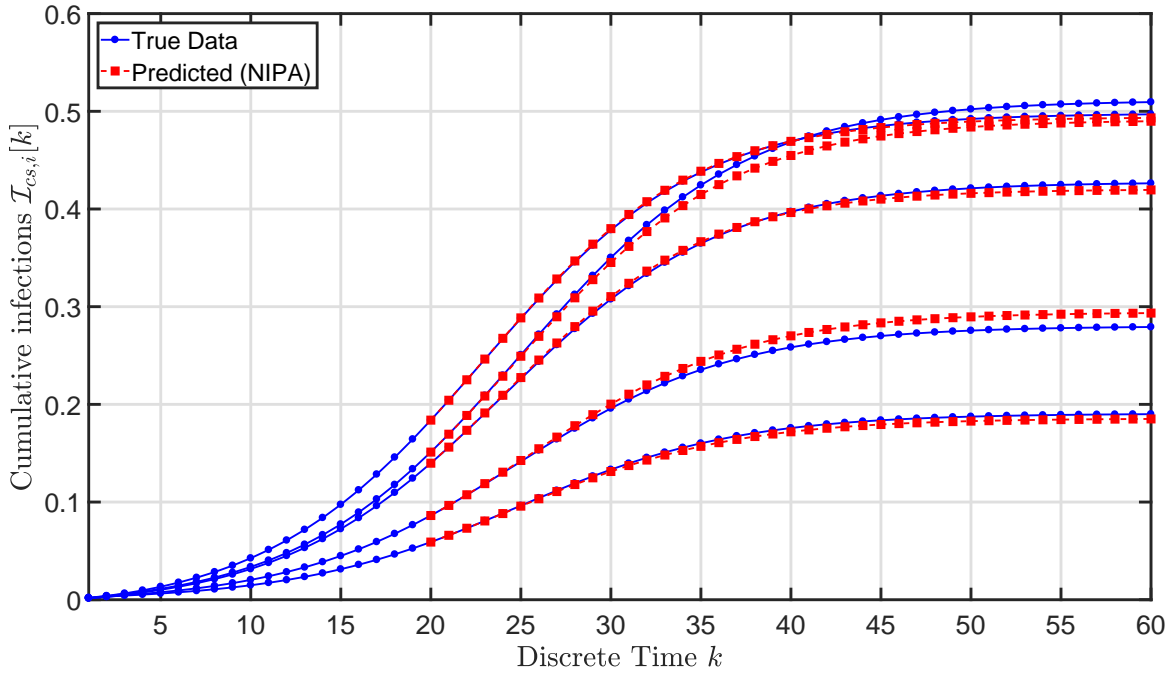

Figure 1: **NIPA prediction for an exact SIR epidemic.** The true cumulative infection state  $\mathcal{I}_{cs,i}[k]$  and the prediction of NIPA. The infection state  $\mathcal{I}_i[k]$  has been generated by the SIR model (3). For clarity, only the infection states  $\mathcal{I}_i[k]$  of five of the  $N = 16$  nodes are depicted.

generate viral state sequences  $v_i[1], \dots, v_i[n]$  similarly as in Fig 1, but we replace the infection state  $\mathcal{I}_i[k]$  for every node  $i$  at every time  $k$  by

$$\mathcal{I}_i[k] \leftarrow \mathcal{I}_i[k] + w_i[k]. \quad (18)$$

Here,  $w_i[k]$  denotes additive white Gaussian noise with zero mean and standard deviation  $\sigma = 0.002$ . The model errors  $w_i[k]$  and  $w_j[k]$  are stochastically independent for all nodes  $i \neq j$ . If the infection state  $\mathcal{I}_i[k]$  resulting from (18) is negative, we set  $\mathcal{I}_i[k] \leftarrow |\mathcal{I}_i[k]|$ . Fig 2 demonstrates of the intensity of the model error  $w_i[k]$ .

Fig 3 demonstrates the NIPA prediction accuracy for the SIR model with model errors  $w_i[k]$ . For times  $k$  that are considerably greater than the observation time  $n$ , the prediction of the cumulative infection state  $\mathcal{I}_{cs,i}[k]$  diverges from true infection state. However, the predictions of NIPA are accurate until approximately  $k \approx n + 5$ , which is valuable for short-term disease counter-measures.

## References

- [1] Paré PE, Liu J, Beck CL, Kirwan BE, Başar T. (2018) Analysis, estimation, and validation of discrete-time epidemic processes. IEEE Transactions on Control Systems Technology.
- [2] Kim SJ, Koh K, Lustig M, Boyd S, Gorinevsky D. (2007) An interior-point method for large-Scale  $l_1$ -regularized least squares. IEEE journal of selected topics in signal processing 1(4):606–617.
- [3] Hastie T, Tibshirani R, Wainwright M. (2015) Statistical learning with sparsity: the lasso and generalizations. CRC press.

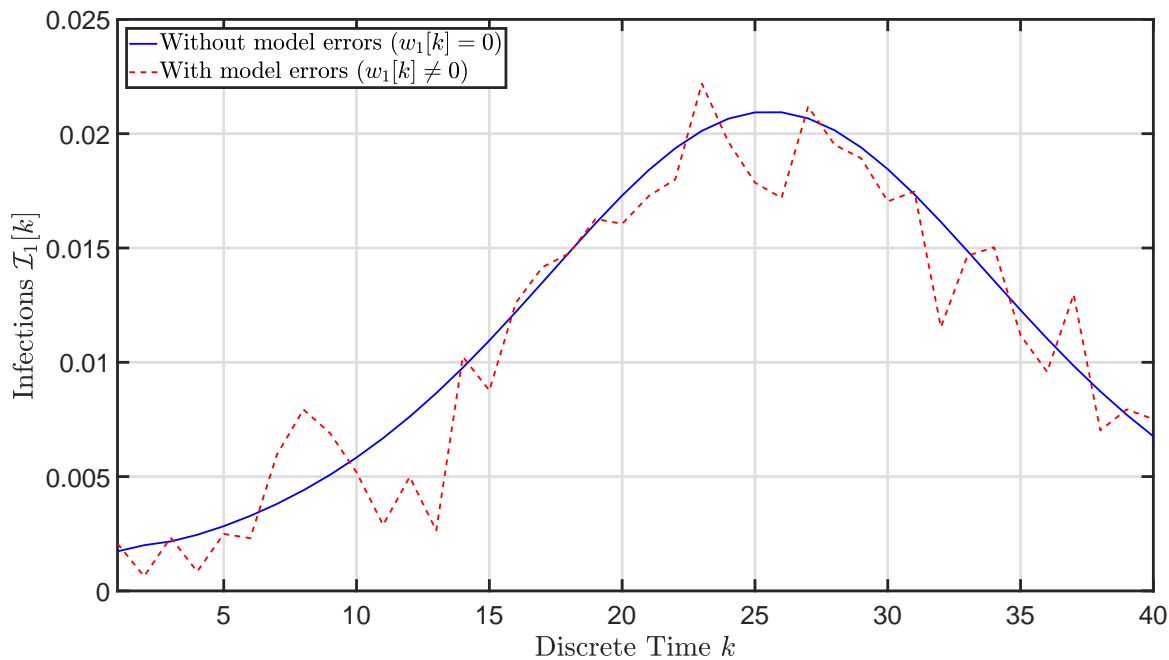

Figure 2: **SIR with and without model errors.** The SIR infection state  $\mathcal{I}_1[k]$  of one node with and without normally distributed model errors  $w_i[k]$  with standard deviation  $\sigma = 0.002$ .

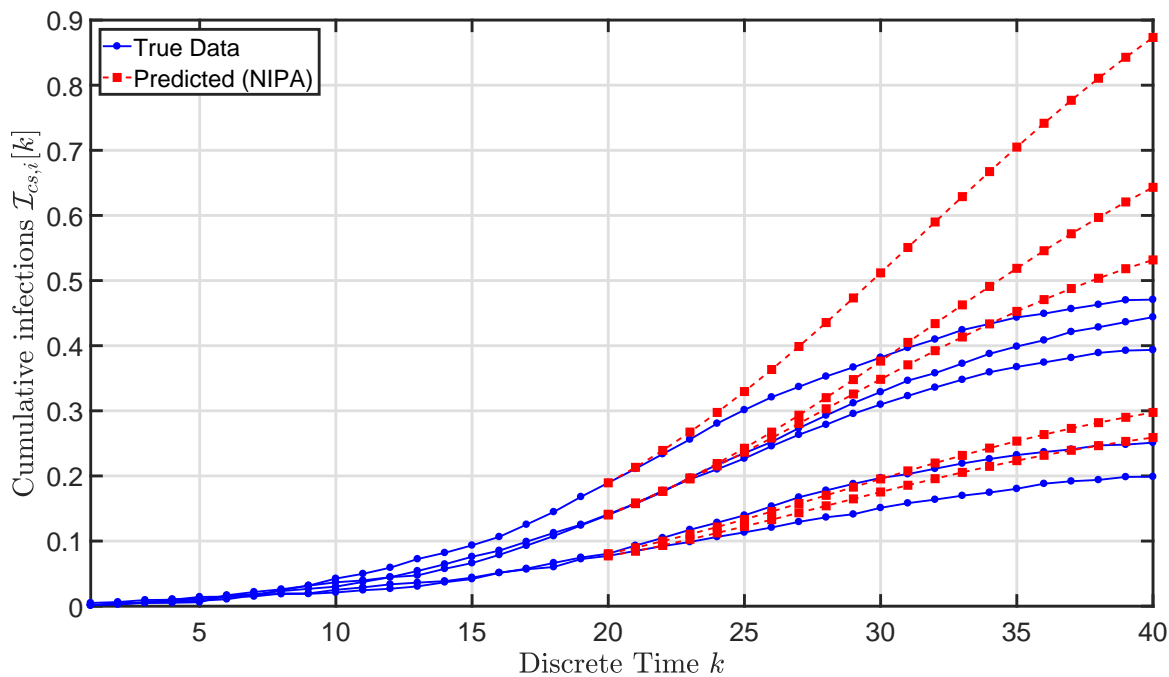

Figure 3: **NIPA prediction for an SIR epidemic with model errors.** The true cumulative infection state  $\mathcal{I}_{cs,i}[k]$  and the prediction of NIPA. The infection state  $\mathcal{I}_i[k]$  has been generated by the SIR model (3) plus normally distributed model errors  $w_i[k]$  with standard deviation  $\sigma = 0.002$ . For clarity, only the infection states  $\mathcal{I}_i[k]$  of five of the  $N = 16$  nodes are depicted.

[4] Erdős P and Rényi A. (1959) On the evolution of random graphs. Publ. Math. Inst. Hung. Acad. Sci. 5:17–60.

Table 1: The Mean Absolute Percentage Error for subfigure 2d for the different cities.

| City      | 1 day  |          | 2 days |          | 3 days |          | 4 days |          |
|-----------|--------|----------|--------|----------|--------|----------|--------|----------|
|           | NIPA   | Logistic | NIPA   | Logistic | NIPA   | Logistic | NIPA   | Logistic |
| Wuhan     | 0.0332 | 0.0096   | 0.0634 | 0.0193   | 0.0767 | 0.0497   | 0.1049 | 0.0701   |
| Huanggang | 0.0115 | 0.0354   | 0.0342 | 0.0424   | 0.0598 | 0.0525   | 0.0969 | 0.0576   |
| Jingzhou  | 0.0121 | 0.0242   | 0.0224 | 0.0425   | 0.0340 | 0.0631   | 0.0409 | 0.0915   |
| Xiangyang | 0.0223 | 0.0485   | 0.0587 | 0.0507   | 0.1019 | 0.0530   | 0.1459 | 0.0598   |
| Xiaogan   | 0.0049 | 0.0066   | 0.0177 | 0.0036   | 0.0281 | 0.0195   | 0.0565 | 0.0214   |
| Xiantao   | 0.0170 | 0.0090   | 0.0431 | 0.0145   | 0.0636 | 0.0305   | 0.0952 | 0.0395   |
| Yichang   | 0.0368 | 0.0389   | 0.0610 | 0.0596   | 0.1026 | 0.0709   | 0.1513 | 0.0806   |
| Shiyan    | 0.0214 | 0.0483   | 0.0225 | 0.0699   | 0.0194 | 0.0938   | 0.0050 | 0.1025   |
| Enshi     | 0.0320 | 0.0849   | 0.0667 | 0.1047   | 0.1042 | 0.1216   | 0.1659 | 0.1198   |
| Jingmen   | 0.0298 | 0.0324   | 0.0358 | 0.0549   | 0.0264 | 0.0694   | 0.0057 | 0.0677   |
| Xianning  | 0.0097 | 0.0045   | 0.0394 | 0.0009   | 0.0508 | 0.0189   | 0.0741 | 0.0328   |
| Huangshi  | 0.0019 | 0.0215   | 0.0102 | 0.0291   | 0.0304 | 0.0341   | 0.0491 | 0.0459   |
| Suizhou   | 0.0155 | 0.0333   | 0.0305 | 0.0489   | 0.0375 | 0.0739   | 0.0573 | 0.0906   |
| Ezhou     | 0.0054 | 0.0457   | 0.0339 | 0.0460   | 0.0612 | 0.0509   | 0.0866 | 0.0604   |
| Tianmen   | 0.0062 | 0.1392   | 0.0467 | 0.2145   | 0.0005 | 0.2151   | 0.0561 | 0.2091   |
| Qianjiang | 0.0494 | 0.0126   | 0.0516 | 0.0163   | 0.0861 | 0.0168   | 0.1092 | 0.0304   |

- [5] Fawcett T. (2006) An introduction to ROC analysis. *Pattern recognition letters* 27(8):861–874.
- [6] Prasse B, Van Mieghem P. (2020) Network reconstruction and prediction of epidemic outbreaks for general group-based compartmental epidemic models. *IEEE Transactions of Network Science and Engineering*.
